# Supplementary material for: Thermally adaptive iohexol-loaded microcages for local computerized tomography
Source: Royal Society of Chemistry journal article supplement (doi:10.1039/d4tb02531h), 2025-01-01
Supplement: d4tb02531h1.pdf [file d4tb02531h1.pdf]

## *Electronic Supporting Information*

# Thermally Adaptive Iohexol-loaded Microcages for Local Computerized Tomography

*Jie Qiao<sup>1, 2, §</sup>, Jiao Dong<sup>1, 2, §</sup>, Jianhao Wang<sup>3, §</sup>, Shuxuan Liu<sup>1, 2</sup>, Yao Wang<sup>1, 2</sup>, Xian  
Li<sup>4, \*</sup>, Hao Li<sup>1, 2, \*</sup>, and Guofu Zhou<sup>1, 2</sup>*

<sup>1</sup> *Guangdong Provincial Key Laboratory of Optical Information Materials and  
Technology & Institute of Electronic Paper Displays, South China Academy of  
Advanced Optoelectronics, South China Normal University, Guangzhou 510006, P.  
R. China*

<sup>2</sup> *National Center for International Research on Green Optoelectronics, South China  
Normal University, Guangzhou 510006, P. R. China*

<sup>3</sup> *Department of radiotherapy, The First Affiliated Hospital of Guangdong University  
of Pharmacy, Guangzhou 510699, P. R. China*

<sup>4</sup> *Department of Radiology, The First Affiliated Hospital of Guangzhou Pharmaceutical  
University, Guangzhou 511436, P. R. China*

\*Corresponding should be addressed to:

Associate Professor Hao Li; Tel: +86-20-39314813; Fax: +86-20-39314813

E-mail: [haoli@m.scnu.edu.cn](mailto:haoli@m.scnu.edu.cn)

Associate Professor Xian Li;

E-mail: [gzlixian2011@163.com](mailto:gzlixian2011@163.com)

§These authors contributed equally to this work.

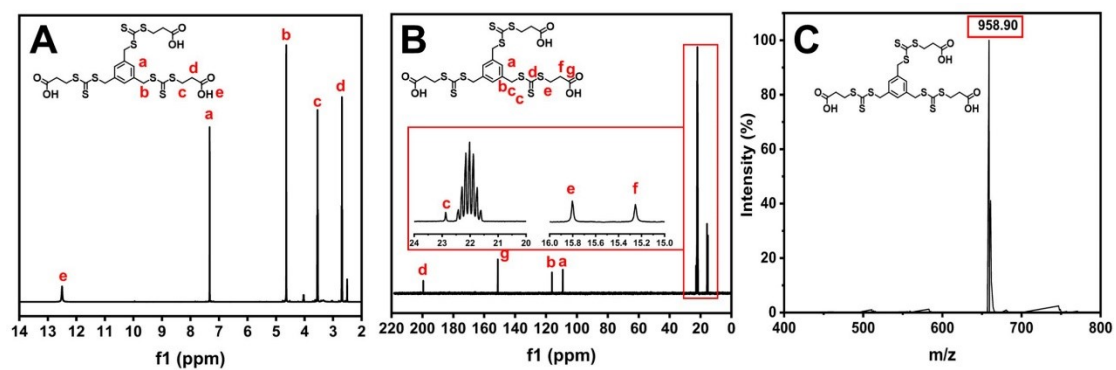

**Figure S1.**  $^1\text{H}$ -NMR (A),  $^{13}\text{C}$ -NMR (B), and mass spectra (C) of chain transfer agent (CTA).

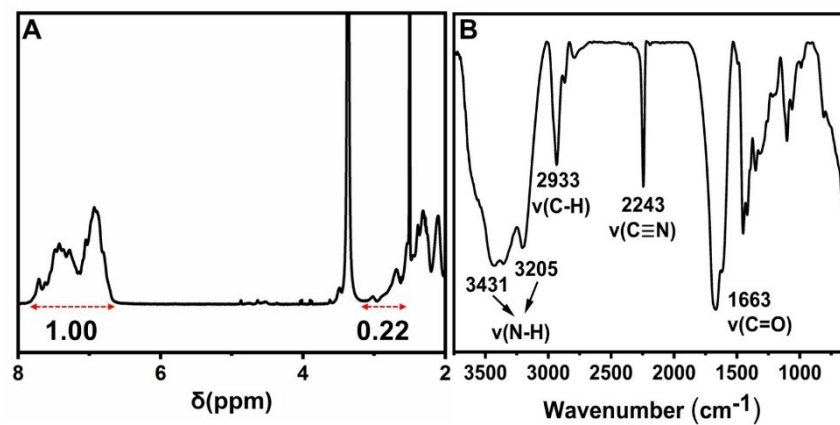

**Figure S2.**  $^1\text{H}$ -NMR (A) and Fourier transform infrared spectra (FT-IR) (B) of the resulting P(AAm-co-AN) copolymer.

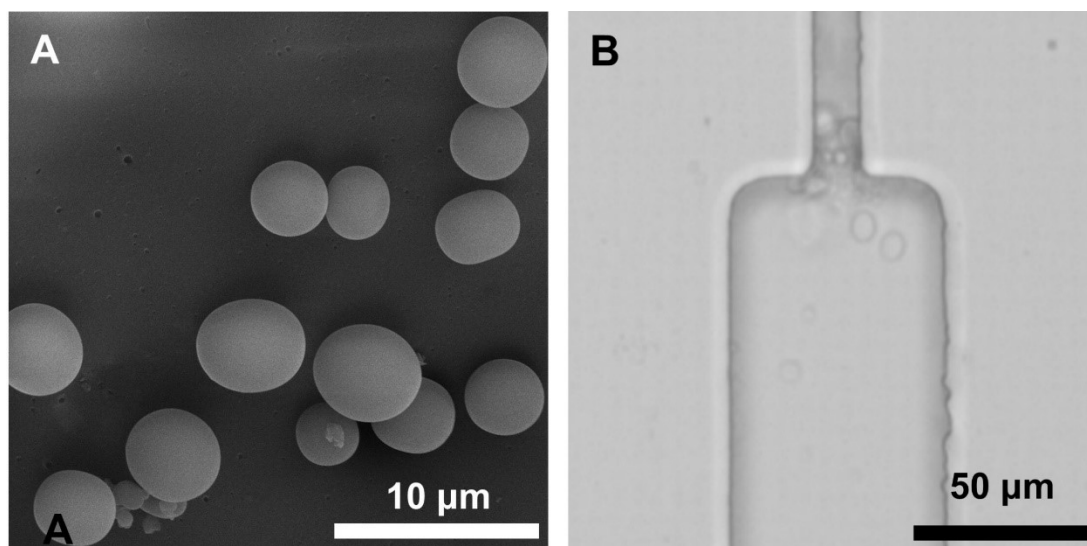

**Figure S3.** SEM morphology in lyophilized state (A), and optical image in aqueous solution (B) of the resulting P(AAm-*co*-AN) microcages (MCs).

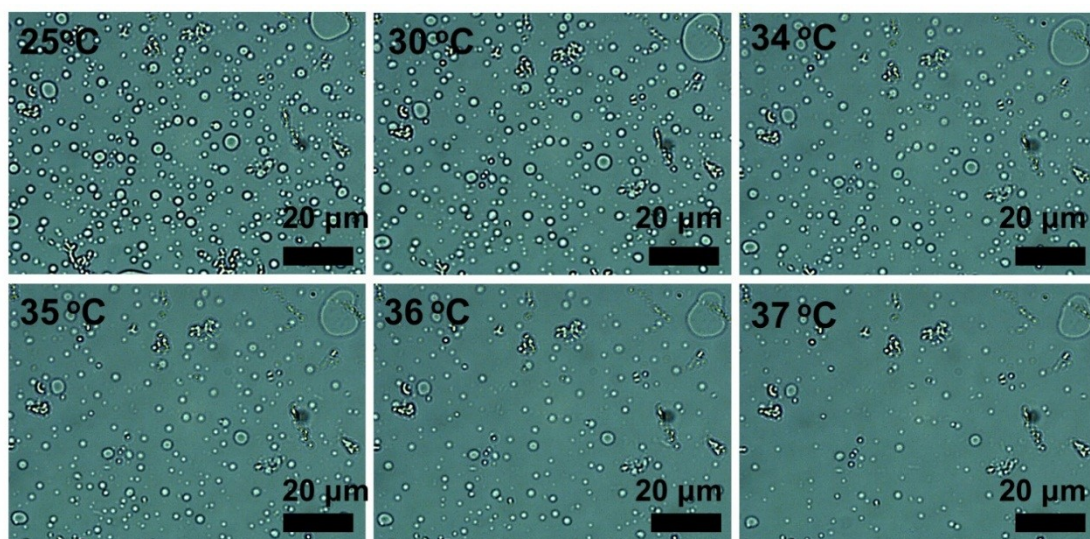

**Figure S4.** Optical images of the resulting P(AAm-co-AN) MCs at different temperature.

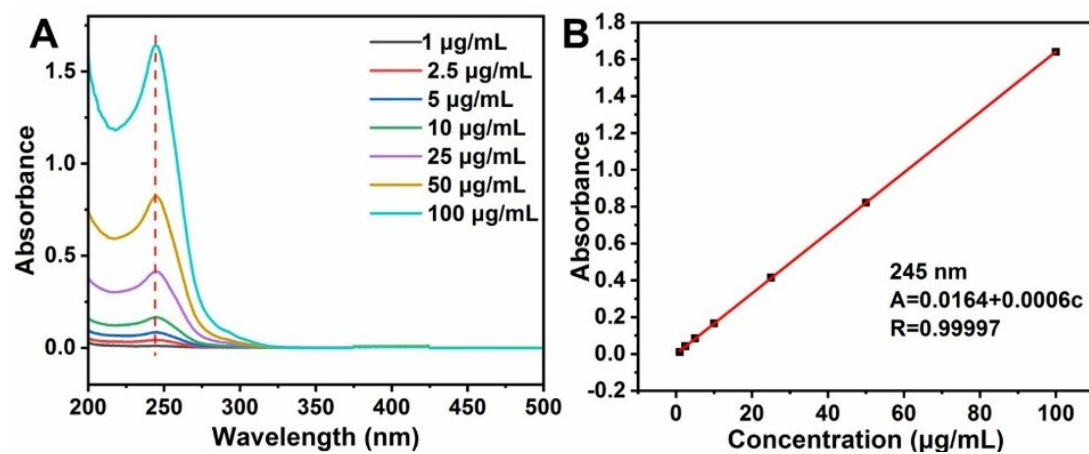

**Figure S5.** UV-Vis absorption spectra of aqueous iohexol solution with different concentrations at 200~400 nm (A) and corresponding standard curve at the maximum absorption peak of 245 nm (B).

**Table S1.** Physicochemical properties of the resulting P(AAm-*co*-AN) copolymer.

| Sample       | Mn(g/mol) | Mw(g/mol) | PDI      |
|--------------|-----------|-----------|----------|
|              | 36959     | 77252     | 1.99     |
| P(Aam-co-AN) | AN(%)     | AAm(%)    | UCST(°C) |
|              | 81.97     | 18.03     | 27.9     |
